# Supplementary material for: Integrating transcriptome and microRNA analysis identifies genes and microRNAs for AHO-induced systemic acquired resistance in N. tabacum
Source: PubMed Central journal article supplement (PMC5624873; doi:10.1038/s41598-017-12249-y), 2017-10-02
Supplement: 41598_2017_12249_MOESM1_ESM.pdf [file 41598_2017_12249_MOESM1_ESM.pdf]

**Integrating transcriptome and microRNA analysis identifies genes and microRNAs for AHO-induced systemic acquired resistance in *N. tabacum***

Yongdui Chen<sup>1#</sup>, Jiahong Dong<sup>1#</sup>, Jeffrey L. Bennetzen<sup>2,5</sup>, Micai Zhong<sup>2</sup>, Jun Yang<sup>3</sup>, Jie Zhang<sup>1</sup>, Shunlin Li<sup>4</sup>, Xiaojiang Hao<sup>4</sup>,  
Zhongkai Zhang<sup>1\*</sup>, Xuewen Wang<sup>2,5\*</sup>

**Supplementary information:**

**Table of Contents**

**I. Supplementary tables ..... 2**

**II. Supplementary software, script and parameters ..... 6**

## I. Supplementary tables

Table S1. Inhibitory effect of AHO on tomato spotted wilt virus in *N. tabacum* leaves

| Treatment<br>AHO concentration ( $\mu\text{g/ml}$ ) | Individual | Control<br>0.00 | AHO<br>1.25 | AHO<br>2.50 | AHO<br>5.00 | AHO<br>10.00 |    |       |    |       |    |
|-----------------------------------------------------|------------|-----------------|-------------|-------------|-------------|--------------|----|-------|----|-------|----|
| Numbers of necrotic lesions                         | 1          | 109             | 146         | 64          | 63          | 25           | 12 | 22    | 20 | 18    | 15 |
|                                                     | 2          | 94              | 116         | 51          | 62          | 42           | 36 | 21    | 22 | 7     | 7  |
|                                                     | 3          | 121             | 140         | 25          | 33          | 18           | 24 | 7     | 6  | 24    | 16 |
|                                                     | 4          | 153             | 180         | 100         | 94          | 45           | 35 | 27    | 27 | 7     | 5  |
|                                                     | 5          | 136             | 160         | 85          | 52          | 40           | 26 | 18    | 23 | 15    | 20 |
| Mean                                                |            | 271.0           |             | 125.8       |             | 60.6         |    | 38.2  |    | 26.8  |    |
| Standard error                                      |            | 20.6            |             | 21.8        |             | 9.0          |    | 6.8   |    | 5.8   |    |
| P<0.01                                              |            | a               |             | b           |             | c            |    | c     |    | c     |    |
| Average inhibitory effect (%)                       |            | --              |             | 53.92       |             | 77.19        |    | 85.79 |    | 89.93 |    |

TSWV was mechanically inoculated on two middle leaves of each plant 24 hours after spraying with AHO. The inhibitory effect was calculated as the percent of (the total necrotic lesions in each control plant – that in each AHO-treated plant) / the total number of necrotic lesions in each control plant $\times$ 100%. One-way ANOVA was used for statistical analysis between treatment and control. Letter a, b, and c represent significance compared to each other at level 0.01.

Table S2. Summary of RNA-seq reads and assembly for *Nicotiana tabacum* K326

| Category      |                  | Data                            |            |                                   |            |
|---------------|------------------|---------------------------------|------------|-----------------------------------|------------|
| RNA-seq reads | Sample ID        | Control_1                       | Control_2  | AHO_1                             | AHO_2      |
|               | Reads            | 21,124,948                      | 21,284,899 | 20,648,828                        | 20,694,821 |
|               | Mapping percent  | 76.62%                          | 76.52%     | 74.10%                            | 73.92%     |
|               | GC(%)            | 42.95                           | 42.95%     | 42.94%                            | 42.95%     |
|               | Q30(%)           | 92.00%                          | 91.80%     | 91.30%                            | 91.10%     |
|               | Total reads      |                                 | 83,753,496 |                                   |            |
|               |                  | <b>De novo Trinity Assembly</b> |            | <b>Referenced guided assembly</b> |            |
| Transcripts   | Total number     | 236,647                         |            | 99,547                            |            |
|               | count (>600 bp)  | 26,972                          |            | 68,455                            |            |
|               | Mean length (bp) | 1,081                           |            | 1,255                             |            |
|               | N50 length (bp)  | 1,775                           |            | 1,791                             |            |
| Unigenes      | Total number     | 95,422                          |            | 66,700                            |            |

Data shows the statistical information of RNA-seq PE-100 reads from Illumina Hiseq 2500 sequencing and assembly by de novo method with from software Trinity or by reference guided with StringTie. The total number of clean reads is the sum of reads from each sample.

Table S3. Unigene annotation by searching against public databases

| Database       | Annotated_Number | 300<=Length<1000 | Percentage | Length>=1000 | Percentage |
|----------------|------------------|------------------|------------|--------------|------------|
| COG            | 7,764            | 1,988            | 2.1%       | 5,135        | 5.4%       |
| GO             | 15,543           | 5,422            | 5.7%       | 7,563        | 7.9%       |
| KEGG           | 10,255           | 3,588            | 3.8%       | 5,135        | 5.4%       |
| KOG            | 17,208           | 5,945            | 6.2%       | 8,571        | 9.0%       |
| Pfam           | 19,623           | 6,047            | 6.3%       | 11,611       | 12.2%      |
| Swissprot      | 18,941           | 6,628            | 6.9%       | 9,680        | 10.1%      |
| nr             | 35,854           | 13,962           | 14.6%      | 14,334       | 15.0%      |
| All_annotated  | 36,073           | 14,059           | 14.7%      | 14,347       | 15.0%      |
| Total Unigenes | 95,422           |                  |            |              |            |

The above table shows the numbers and percentage of unigenes annotated in databases. The number shown in the last row is the total count of annotated genes after removing duplicated unigenes.

Table S4. miRNA identification in *N. tabacum*

Excel file: STable4 miRNA\_and\_DEM.xls

Table S5. Predicted miRNA regulated target genes with differential expression

Excel file: Stable5 target.DEG.2fold\_Vs\_miRNAseq\_k326\_family\_updated.xls

Table S6. Primers for qRT-PCR validation of miRNA and mRNA expression

| ID            | RT primer (5'-3')                                       | Forward primer (5'-3')          | Universal primer (5'-3')  |
|---------------|---------------------------------------------------------|---------------------------------|---------------------------|
| <b>miRNAs</b> |                                                         |                                 |                           |
| miR156v       | GTCGTATCCAGTGCAGGGTCCGAGGTATTTCGCACTGG<br>ATACGACGTGCTC | GCG CGC GTT GAC AGA AGA TAG A   | ATCCAGTGCAGGGTCCGAGG      |
| miR172f       | GTCGTATCCAGTGCAGGGTCCGAGGTATTTCGCACTGG<br>ATACGACATGCAG | GCG CGC GAG AAT CTT GAT GAT G   | ATCCAGTGCAGGGTCCGAGG      |
| miR172g       | GTCGTATCCAGTGCAGGGTCCGAGGTATTTCGCACTGG<br>ATACGACATGCAG | GCG CGC GAG AAT CTT GAT GAT G   | ATCCAGTGCAGGGTCCGAGG      |
| miR7997       | GTCGTATCCAGTGCAGGGTCCGAGGTATTTCGCACTGG<br>ATACGACCATTTT | GCG CGT TGC TCG GAC TCT TCA     | ATCCAGTGCAGGGTCCGAGG      |
| novel101      | GTCGTATCCAGTGCAGGGTCCGAGGTATTTCGCACTGG<br>ATACGACTTTTTG | CGC GCG ATT CTT TTT TGA ACG GAC | ATCCAGTGCAGGGTCCGAGG      |
| novel152      | GTCGTATCCAGTGCAGGGTCCGAGGTATTTCGCACTGG<br>ATACGACGAGAGT | CGC GAA GGT CTG CGT ACA CAT T   | ATCCAGTGCAGGGTCCGAGG      |
| novel156      | GTCGTATCCAGTGCAGGGTCCGAGGTATTTCGCACTGG<br>ATACGACGGGTAT | TGC GAG AGA GGC TGT TTC CGA T   | ATCCAGTGCAGGGTCCGAGG      |
| novel98       | GTCGTATCCAGTGCAGGGTCCGAGGTATTTCGCACTGG<br>ATACGACAATATA | GCG CGT TGT TGG ATC CGT AGT AT  | ATCCAGTGCAGGGTCCGAGG      |
| U6            |                                                         | TTGGAACGATACAGAGAAGATTAGC       | AATTTGGACCATTTCTCGATTGTG  |
| <b>Genes</b>  |                                                         |                                 |                           |
| c56968.g_c0   |                                                         | GCAAATGCCCACTCAGGTTG            | GACGCATTTGTTGAGGGTGC      |
| c58965.g_c0   |                                                         | GACCAAACAAGCACTCGCAA            | CTGGAGGGATCATTGGTTTTTG    |
| c64248.g_c1   |                                                         | TAGTGTGTACGCAGACCTTACCCT        | GAGTTTGTCTTCTGGTTTCATGCGT |
| c43078.g_c0   |                                                         | GGAGAGGGTAGTGTGTTTCGCAG         | AAGCTCCTCTACACGAGTCCT     |
| c44105.g_c1   |                                                         | TCCGAGGAAGAACTGAGTCGAGG         | AATATAAGCGGGTATGGGGAGG    |
| c45235.g_c0   |                                                         | GGCAGTCCACAGAGAAAGGG            | CACTAGTGGGACCTGGGAGG      |
| c56252.g_c0   |                                                         | CCGGCATGTAATTCTGCTGGAATG        | GACACCAAGAAGGCATAGTCGAGG  |
| Actin         |                                                         | TTGGAACGATACAGAGAAGATTAGC       | AATTTGGACCATTTCTCGATTGTG  |

## II. Supplementary software, script and parameters

- **De novo transcript assembly:**

Software: Trinityrnaseq, version r20160317,

Parameters (default otherwise described here): --min\_contig\_length 200, --group\_pairs\_distance 500

Others default

Script and instruction is described from published protocol <sup>1</sup>, web link

<http://www.nature.com/nprot/journal/v8/n8/full/nprot.2013.084.html>

- **Reference guided transcript assembly:**

Software Hisat (version 2.0.5) and StringTie (version 1.3.3b)

Script and instruction is described from published protocol <sup>2</sup>, web link

<http://www.nature.com/nprot/journal/v11/n9/full/nprot.2016.095.html>

- **RSEM (bundled in Trinity package): v5.10.1**

Parameters: default

Script and instruction is described from published protocol <sup>1</sup>, web link

<http://www.nature.com/nprot/journal/v8/n8/full/nprot.2013.084.html>

- **Blast analysis:**

Tool: BLAST, version 2.2.31, (default otherwise described here):

```
#####this script is used to annotate unigene
# the unigeneSequence.fa. for the query sequence
p="unigeneSequence.fa"
#set up the downloaded database to variable $d such as Nr
d="Nr"
# sourcedir is for unigenes directory
#output format "6 std" and added column qlen for query length
blastn -query $p -db $d -evalue 1e-5 -outfmt '6 std qlen' -penalty -4 -gapopen 2 -gapextend 2 \
```

```
-best_hit_overhang 0.25 -word_size 10 -num_threads 8 -out $p-$d.blastout
```

```
#####this script is to identify tRNA, snoRNA and rRNA database pfam .
```

```
#$q is the file name of the raw miRNA candidates' sequence
```

```
#pfam is the database
```

```
#results saved in file pfam_similarRNA.blastout in plain text
```

```
Blastall -p blastn -F -i $q -d pfam -e 1e-5 -W 4 -G 2 -q -4 -m 8 -o pfam_similarRNA.blastout
```

```
Blast2go: version 2.5, (default otherwise described here): E-value 1e-5
```

- **Differentially expressed gene or miRNA:**

1. EdgeR (bundled in Trinity package): FC 2, FDR 0.05

Script and instruction is described from published protocol <sup>1</sup>, web link

<http://www.nature.com/nprot/journal/v8/n8/full/nprot.2013.084.html>

2. DEseq, version 1.16: Fold change 2, P 0.05

- 1) script Name: DEseq2\_script.R

```
#usage: copy the following lines and paste into R console
```

```
## For DEseq2 differential expression analysis of miRNA and mRNA in this study
```

```
## For differential expression graph plot
```

```
#set working dir
```

```
setwd('E:/DEseq/script')
```

```
#get read counts called cts, and sample information called coldata
```

```
cts <- read.csv(file="miRNA_count.csv", header=TRUE)
```

```
rownames(cts)<- cts[,1]
```

```
cts<- cts[,-1]
```

```
head(cts,3)
```

```
## Control AHO
```

```

##novelMiR_11821 44899 0
##novelMiR_11548 44899 0
##novelMiR_11950 39784 37664
coldata <- read.table(file="colData.txt", header=TRUE)
head(coldata,5)
##      group treatment
## 1 Tab_Control_S1 Control
## 2 Tab_AHO_S2 AHO
library("DESeq2")
coldata$treatment = factor(x = coldata$treatment,levels = c('Control', 'AHO'))
#construct DESeq object
dds = DESeqDataSetFromMatrix(countData = cts, colData = coldata, design = ~ treatment)
dds = DESeq(dds)
res = results(dds)
write.table(res, file="DEM_Deseq_result.txt", sep="\t",col.names=NA)
##filtered results of differential expression FC >=2, P<=0.05
DEM_FC2P0.05 <- subset(res, abs(log2FoldChange)>=1 & pvalue<=0.05)
write.table(DEM_FC2P0.05, file="DEM_Deseq_result_FC2P0.05.txt", sep="\t",col.names=NA)

```

2) script Name: Vocanal\_plot.R

```

##plot graph
##construct data frame with fold change and p value from res or input data file
tab = data.frame(log2FC = res$log2FoldChange, negLogPval = -log10(res$pvalue))
par(mar = c(5, 4, 4, 4))
plot(tab, pch = 16, cex = 0.6, xlab = expression(log[2]~FC), ylab = expression(-log[10]~pvalue))
signGenes = (tab$log2FC > 1 & tab$negLogPval > -log10(0.05))
points(tab[signGenes, ], pch = 16, cex = 0.5, col = "red")
signGenes = (tab$log2FC < -1 & tab$negLogPval > -log10(0.05))
points(tab[signGenes, ], pch = 16, cex = 0.5, col = "green")

```



```
abline(h = -log10(0.05), col = "orange", lty = 2)
abline(v = c(-1, 1), col = "blue", lty = 2)
```

### 3) script Name: Goseq\_script.R

```
library(goseq)
##all DEseq output as input here
all.genes <- read.table(file="DEG_Deseq_result.gene.txt", header=TRUE)
all.genes <- as.data.frame(all.genes)
rownames(all.genes) <- all.genes[,1]
genes <- as.integer(all.genes$padj < 0.05 & abs(all.genes$log2FoldChange)>=1)
names(genes) <- row.names(all.genes)
genes <- na.omit(genes)
glength<- read.table(file="DEG_Deseq_result.gene.filter.id.list.len", header=FALSE)
glen <- glength[,2]
pwf = nullp(genes, bias.data=as.vector(glen))
getko <- read.table("DEG_Deseq_result.gene.filter.id.list.go.NA.txt", header=F, sep="\t", fill=T)
GO.wall <- goseq(pwf, gene2cat=getko[,c(1,2)])
##> head(GO.wall,3)
##  category over_represented_pvalue under_represented_pvalue numDEInCat numInCat
##  category over_represented_pvalue under_represented_pvalue numDEInCat numInCat
##67 ko04111      0.001520392      0.9997066      22      26
##8  ko00196      0.003058524      0.9989970      28      39
##68 ko04113      0.009473834      0.9985285      14      16
```

### 4) script Name: heatmap\_script.R

```
##construct a log2FPKM data file
##instruction from https://www.rdocumentation.org/packages/gplots/versions/3.0.1/topics/heatmap.2
```

```
##### the R script to make the heatmap
## to prepare data for heatmap
##to run this part within R console
data <-read.table("degFPKMPlus1log2.txt", header=TRUE, sep="\t")
mat_data <- data.matrix(data[,2:ncol(data)])
rownames(mat_data) <- data[,1]
my_palette <- colorRampPalette(c("green", "yellow", "red"))(n = 60)
heatmap.2(mat_data,
  labRow = "",
  key.xlab = "",
  keysize = 1,
  density.info="none",
  trace="none
  scale="col",
  margins =c(9,9),
  col=my_palette,
  dendrogram="both",
  key= TRUE,
  key.par=list(mar=c(4.5,0.4,1, 0.2)),
  )
```

## References

- 1 Haas, B. J. *et al.* De novo transcript sequence reconstruction from RNA-seq using the Trinity platform for reference generation and analysis. *Nature protocols* **8**, 1494-1512, doi:10.1038/nprot.2013.084 (2013).
- 2 Pertea, M., Kim, D., Pertea, G. M., Leek, J. T. & Salzberg, S. L. Transcript-level expression analysis of RNA-seq experiments with HISAT, StringTie and Ballgown. *Nat. Protocols* **11**, 1650-1667, doi:10.1038/nprot.2016.095 (2016).
